# Supplementary material for: Anxiety-like behavior and microglial activation in the amygdala after acute neuroinflammation induced by microbial neuraminidase
Source: PubMed Central journal article supplement (PMC9270343; doi:10.1038/s41598-022-15617-5), 2022-07-08
Supplement: 41598_2022_15617_MOESM1_ESM.pdf [file 41598_2022_15617_MOESM1_ESM.pdf]

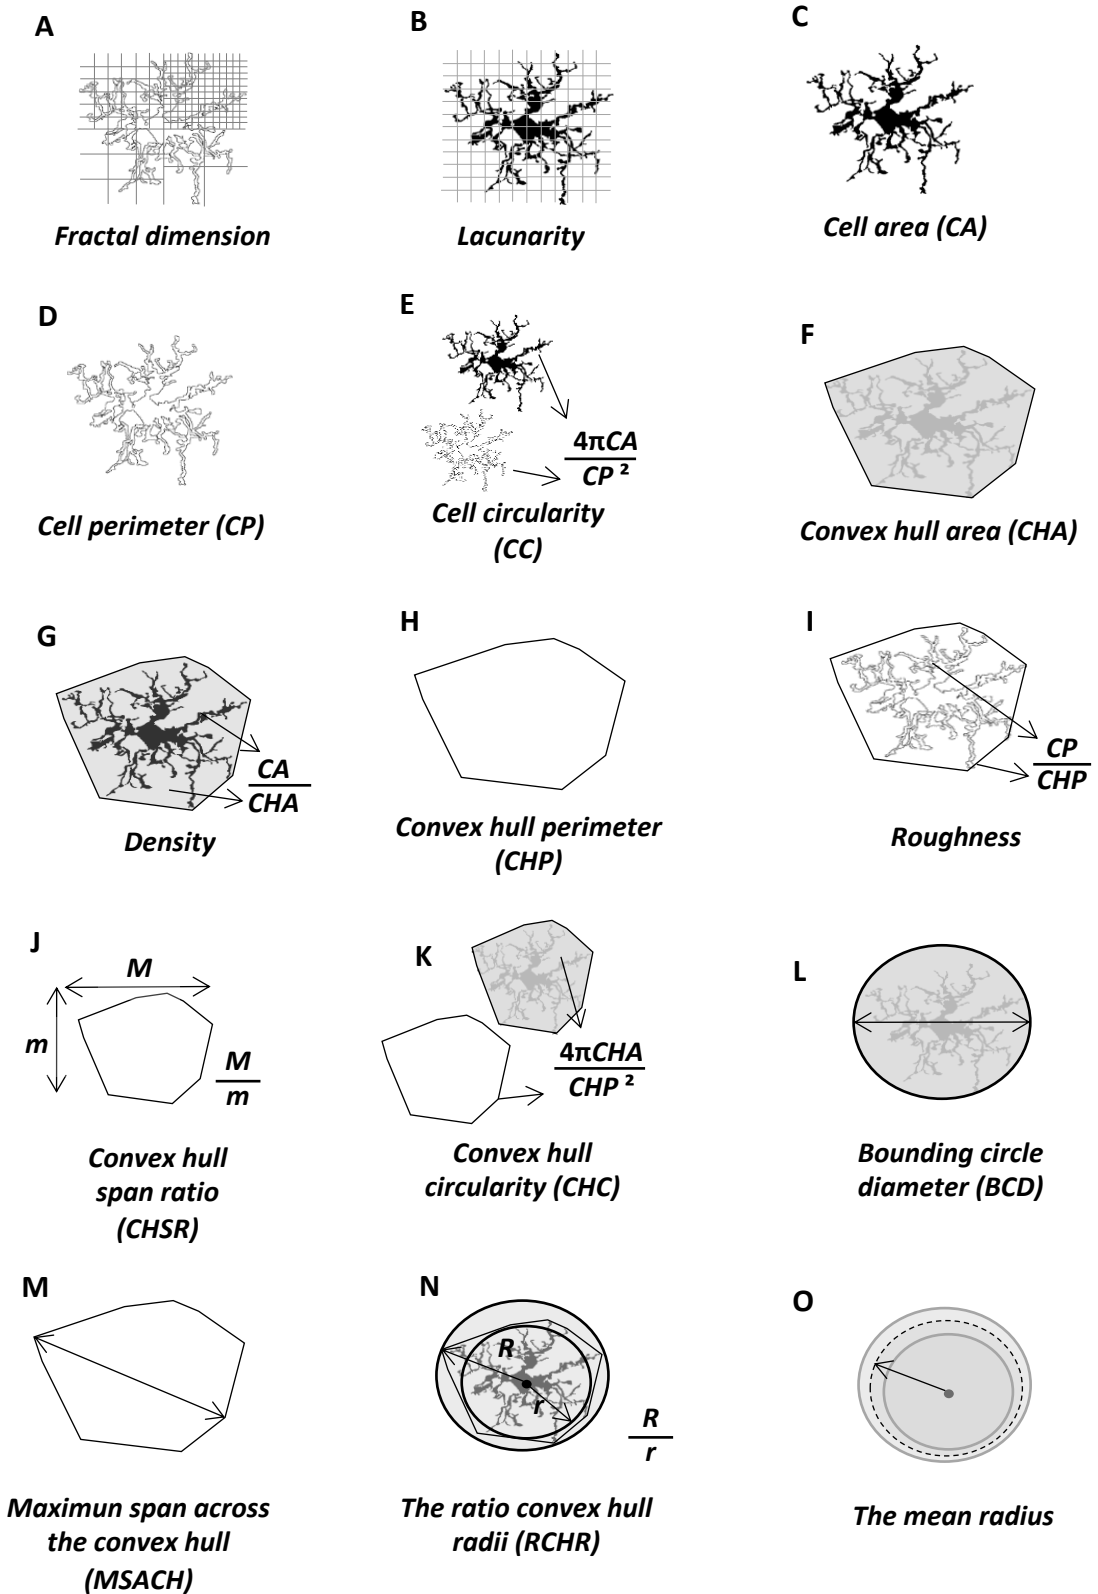

**Fig. S1.** A schematic explanation of the morphological parameters measured in individual microglial cells. A comprehensive explanation may be found in Fernández-Arjona et al., 2017.
